# Supplementary material
Source: Research Square preprint supplement (doi:10.21203/rs.3.rs-8976368/v1)
Supplement: Supplementary file 1 [file 2eddf079e343297e774d2744.docx]

**Note: Introduction to FIB-4**

FIB-4 is a non-invasive blood indicator calculated based on age, aspartate aminotransferase, alanine aminotransferase, and platelet count[1]. Its calculation formula is as follows: . This indicator is designed to assess whether patients with chronic liver diseases have a significant risk of severe liver fibrosis or cirrhosis[2–4]. The core logic lies in the fact that older age, elevated AST, or decreased platelet count usually indicate a higher degree of liver fibrosis[5]. This index is mainly used as a screening tool to help doctors distinguish between high-risk and low-risk populations, thereby determining whether further invasive examinations such as liver stiffness scans or liver biopsies are necessary.

In clinical interpretation, a FIB-4 value less than 1.3 is generally regarded as low risk, indicating a high probability that the patient does not have significant liver fibrosis and usually does not require immediate liver biopsy[6]. A value greater than 2.67 falls into the high-risk category, suggesting a higher possibility of significant fibrosis or cirrhosis[7]. It is strongly recommended to conduct a more in-depth diagnostic confirmation. For the gray area between 1.3 and 2.67, due to the uncertainty of the results, doctors usually need to combine the patient's other clinical manifestations, medical history, or conduct a comprehensive assessment through other non-invasive scoring systems[8]. They also recommend that the patient be re-examined within 6 to 12 months.

**Reference**

1. Sterling RK, Lissen E, Clumeck N, Sola R, Correa MC, Montaner J, et al. Development of a simple noninvasive index to predict significant fibrosis in patients with HIV/HCV coinfection. Hepatology. 2006;43:1317–25. https://doi.org/10.1002/hep.21178

2. Choi SJ, Yoon S, Kim K-K, Kim D, Lee HE, Kim KG, et al. A Composite Blood Biomarker Including AKR1B10 and Cytokeratin 18 for Progressive Types of Nonalcoholic Fatty Liver Disease. Diabetes Metab J. 2024;48:740–51. https://doi.org/10.4093/dmj.2023.0189

3. Ng CH, Tan DJH, Lim XC, Yong JN, Syn N, Soon GST, et al. A Diagnostic Test Meta-Analysis Evaluating Imaging-Based and Blood Biomarker-Based Assessment Tools for Fibrosis After Liver Transplantation. Liver Transpl. 2022;28:659–69. https://doi.org/10.1002/lt.26345

4. Yang Y, Liu J, Sun C, Shi Y, Hsing JC, Kamya A, et al. Nonalcoholic fatty liver disease (NAFLD) detection and deep learning in a Chinese community-based population. Eur Radiol. 2023;33:5894–906. https://doi.org/10.1007/s00330-023-09515-1

5. Schreiner AD, Moran WP, Zhang J, Livingston S, Marsden J, Mauldin PD, et al. The Association of Fibrosis-4 Index Scores with Severe Liver Outcomes in Primary Care. J Gen Intern Med. 2022;37:3266–74. https://doi.org/10.1007/s11606-021-07341-z

6. Inmutto N, Jantarangkoon A, Nimitrungtawee N, Sriwicha N, Kongkarnka S, Sethasathien S, et al. Doppler ultrasound and 2D shear wave ultrasound elastography for liver fibrosis evaluation in Fontan-associated liver disease. BMC Gastroenterol. 2025;25:553. https://doi.org/10.1186/s12876-025-04151-z

7. Yg S, Sa P, Kh P, Cs M. Fibrosis-4 Index Predicts Long-Term All-Cause, Cardiovascular and Liver-Related Mortality in the Adult Korean Population. Clinical gastroenterology and hepatology : the official clinical practice journal of the American Gastroenterological Association [Internet]. Clin Gastroenterol Hepatol; 2023 [cited 2026 Jan 13];21. https://doi.org/10.1016/j.cgh.2023.04.026

8. Kang N-L, Ruan Q-F, Zhang D-S, Yu X-P, Hu Z-T, Lin Z-M, et al. Advantages of a Novel Model for Predicting Hepatic Fibrosis in Chronic Hepatitis B Virus Carriers Compared with APRI and FIB-4 Scores. J Clin Transl Hepatol. 2022;10:412–9. https://doi.org/10.14218/JCTH.2022.00098
