# Supplementary material
Source: Research Square preprint supplement (doi:10.21203/rs.3.rs-8976368/v1)
Supplement: Supplementary file 2 [file 9bf27f1349119d3dab9822c4.docx]

| LASSO | |
| --- | --- |
| (Intercept) | -4.21711 |
| SEX | 0 |
| Income | 0 |
| Routine | 0 |
| Live | 0 |
| Exercise | 0 |
| Dietary | 0 |
| Taste | 0 |
| Hypochondriac Pain | 0 |
| Hypochondriac  Distention and Fullness | 0 |
| Abdominal Bloating | 0 |
| Generalized  Heaviness and Fatigue | 0 |
| Fatigue | 0 |
| Sigh | 0 |
| Loss of Appetite | 0 |
| Aversion to Greasy | 0 |
| Dry Mouth | 0 |
| Dark Urine | 0 |
| Sleep | 0 |
| Height | 0 |
| Weight | 0.184406 |
| Waistline | 2.456086 |
| Hipline | 0 |
| SBP | 0.369679 |
| DBP | 0 |
| Body fat rate | -0.29865 |
| BMI | 0 |
| WHR | 0 |
| Abdominal girth | 0 |
| ALT | 2.858735 |
| AST | 0 |
| GGT | 0.759338 |
| ALP | 0 |
| TG | 0 |
| TC | 0 |
| HDL-C | 0 |
| LDL-C | 0 |
| Sleep hours | 0 |
| Walk hours | 0 |
| Housework hours | 0 |
| Age | 2.533234 |
| WBC | 0 |
| Hb | 0 |
| PLT | 0 |

| Brouta Variables |
| --- |
| Height |
| Weight |
| Waistline |
| Hipline |
| SBP |
| Body fat rate |
| BMI |
| WHR |
| Abdominal girth |
| ALT |
| AST |
| GGT |
| LDL-C |
| Age |
