# Supplementary material
Source: Research Square preprint supplement (doi:10.21203/rs.3.rs-8976368/v1)
Supplement: Supplementary file 3 [file c189d536f52df97341469513.docx]

Logistics ：

| Dep. Variable: | Outcome | No. Observations: | 2183 |
| --- | --- | --- | --- |
| Model: | Logit | Df Residuals: | 2174 |
| Method: | MLE | Df Model: | 8 |
| Date: | Sun, 14 Dec 2025 | Pseudo R-squ.: | 0.1598 |
| Time: | 22:58:53 | Log-Likelihood: | -1210.1 |
| converged: | True | LL-Null: | -1440.2 |
| Covariance Type: | nonrobust | LLR p-value: | 2.405e-94 |

|  | coef | std err | z |
| --- | --- | --- | --- |
| const | -3.5493 | 0.469 | -7.563 |
| ALT | 0.0153 | 0.002 | 8.922 |
| AST | -0.0011 | 0.003 | -0.374 |
| SBP | 0.0055 | 0.001 | 6.065 |
| BMI | 0.0065 | 0.005 | 1.429 |
| WHR | 0.5076 | 0.131 | 3.880 |
| DBP | 0.0023 | 0.005 | 0.458 |
| LDL-C | 0.0116 | 0.009 | 1.288 |
| GGT | 0.0073 | 0.002 | 4.646 |

**Decision trees default parameters：**

| ccp_alpha | 0.0 |
| --- | --- |
| class_weight | None |
| criterion | gini |
| max_depth | None |
| max_features | None |
| max_leaf_nodes | None |
| min_impurity_decrease | 0.0 |
| min_samples_leaf | 1 |
| min_samples_split | 2 |
| min_weight_fraction_leaf | 0.0 |
| monotonic_cst | None |
| random_state | 123 |
| splitter | best |

**Optimized parameters of the decision tree model：**

| bootstrap | True |
| --- | --- |
| ccp_alpha | 0.0 |
| class_weight | None |
| criterion | gini |
| max_depth | None |
| max_features | sqrt |
| max_leaf_nodes | None |
| max_samples | None |
| min_impurity_decrease | 0.0 |
| min_samples_leaf | 1 |
| min_samples_leaf | 1 |
| min_samples_split | 2 |
| min_weight_fraction_leaf | 0.0 |
| monotonic_cst | None |
| min_samples_leaf | 1 |
| min_samples_split | 2 |
| min_weight_fraction_leaf | 0.0 |
| monotonic_cst | None |
| n_estimators | 100 |
| n_jobs | None |
| oob_score | True |
| random_state | 123 |
| verbose | 0 |
| min_samples_leaf | 1 |
| min_samples_split | 2 |
| min_weight_fraction_leaf | 0.0 |
| monotonic_cst | None |
| n_estimators | 100 |
| n_jobs | None |
| min_samples_leaf | 1 |
| min_samples_split | 2 |
| min_weight_fraction_leaf | 0.0 |
| monotonic_cst | None |
| min_samples_split | 2 |
| min_weight_fraction_leaf | 0.0 |
| monotonic_cst | None |
| min_weight_fraction_leaf | 0.0 |
| monotonic_cst | None |
| n_estimators | 100 |
| n_jobs | None |
| n_estimators | 100 |
| n_jobs | None |
| oob_score | True |
| random_state | 123 |
| n_jobs | None |
| oob_score | True |
| random_state | 123 |
| oob_score | True |
| random_state | 123 |
| random_state | 123 |
| verbose | 0 |
| warm_start | False |

**The optimal parameter combination of the decision tree model：**

{'ccp_alpha': 0.0, 'max_depth': 3, 'max_features': None, 'min_samples_split': 5}

**Random forest default parameters：**

| bootstrap | True |
| --- | --- |
| ccp_alpha | 0.0 |
| class_weight | None |
| criterion | gini |
| max_depth | None |
| max_features | sqrt |
| max_leaf_nodes | None |
| max_samples | None |
| min_impurity_decrease | 0.0 |
| min_samples_leaf | 1 |
| min_samples_split | 2 |
| min_weight_fraction_leaf | 0.0 |
| monotonic_cst | None |
| n_estimators | 100 |
| n_jobs | None |
| oob_score | True |
| random_state | 123 |
| verbose | 0 |
| warm_start | False |

**Optimized parameters of the random forest model：**

| bootstrap | True |
| --- | --- |
| ccp_alpha | 0.0 |
| class_weight | None |
| criterion | gini |
| max_depth | 5 |
| max_features | sqrt |
| max_leaf_nodes | None |
| max_samples | None |
| min_impurity_decrease | 0.0 |
| min_samples_leaf | 20 |
| min_samples_split | 2 |
| min_weight_fraction_leaf | 0.0 |
| monotonic_cst | None |
| n_estimators | 100 |
| n_jobs | None |
| oob_score | True |
| random_state | 123 |
| verbose | 0 |
| warm_start | False |

**Optimal parameter combination of the random forest model:**

n_estimators = 100 , max_features = sqrt

**XGBoost default parameters**:

| objective | binary:logistic |
| --- | --- |
| base_score | None |
| booster | None |
| callbacks | None |
| colsample_bylevel | None |
| colsample_bynode | None |
| colsample_bytree | None |
| device | None |
| early_stopping_rounds | None |
| enable_categorical | False |
| eval_metric | logloss |
| feature_types | None |
| feature_weights | None |
| gamma | None |
| grow_policy | None |
| importance_type | None |
| interaction_constraints | None |
| learning_rate | None |
| max_bin | None |
| max_cat_threshold | None |
| max_cat_to_onehot | None |
| max_delta_step | None |
| max_depth | None |
| max_leaves | None |
| min_child_weight | None |
| missing | NaN |
| monotone_constraints | None |
| multi_strategy | None |
| n_estimators | None |
| n_jobs | None |
| num_parallel_tree | None |
| random_state | 123 |
| reg_alpha | None |
| reg_lambda | None |
| sampling_method | None |
| scale_pos_weight | None |
| subsample | None |
| tree_method | None |
| validate_parameters | None |
| verbosity | None |

**Optimized parameters of the XGBoost model：**

| objective | binary:logistic |
| --- | --- |
| base_score | None |
| booster | None |
| callbacks | None |
| colsample_bylevel | None |
| colsample_bynode | None |
| colsample_bytree | None |
| device | None |
| early_stopping_rounds | None |
| enable_categorical | False |
| eval_metric | logloss |
| feature_types | None |
| feature_weights | None |
| gamma | None |
| grow_policy | None |
| importance_type | None |
| interaction_constraints | None |
| learning_rate | 0.01 |
| max_bin | None |
| max_cat_threshold | None |
| max_cat_to_onehot | None |
| max_delta_step | None |
| max_depth | 5 |
| max_leaves | None |
| min_child_weight | None |
| missing | NaN |
| monotone_constraints | None |
| multi_strategy | None |
| n_estimators | 200 |
| n_jobs | None |
| num_parallel_tree | None |
| random_state | 123 |
| reg_alpha | None |
| reg_lambda | None |
| sampling_method | None |
| scale_pos_weight | None |
| subsample | 0.6 |
| tree_method | None |
| validate_parameters | None |
| verbosity | None |

**Optimal XGBoost Model Parameter Configuration:**

{'learning_rate': 0.01, 'max_depth': 5, 'n_estimators': 200, 'subsample': 0.6}

**LightGBM default parameters**:

| boosting_type | gbdt |
| --- | --- |
| class_weight | None |
| colsample_bytree | 1.0 |
| importance_type | split |
| learning_rate | 0.1 |
| max_depth | -1 |
| min_child_samples | 20 |
| min_child_weight | 0.001 |
| min_split_gain | 0.0 |
| n_estimators | 100 |
| n_jobs | None |
| num_leaves | 31 |
| objective | None |
| random_state | 123 |
| reg_alpha | 0.0 |
| reg_lambda | 0.0 |
| subsample | 1.0 |
| subsample_for_bin | 200000 |
| subsample_freq | 0 |

**Optimized parameters of the LightGBM model：**

| boosting_type | gbdt |
| --- | --- |
| class_weight | None |
| colsample_bytree | 0.8 |
| importance_type | split |
| learning_rate | 0.05 |
| max_depth | -1 |
| min_child_samples | 300 |
| min_child_weight | 0.001 |
| min_split_gain | 0.0 |
| n_estimators | 200 |
| n_jobs | None |
| num_leaves | 7 |
| objective | None |
| random_state | 123 |
| reg_alpha | 0.0 |
| reg_lambda | 0.0 |
| subsample | 0.8 |
| subsample_for_bin | 200000 |
| subsample_freq | 0 |

**Optimal LightGBM model parameter configuration:**

{'colsample_bytree': 0.8, 'learning_rate': 0.05, 'min_child_samples': 300, 'n_estimators': 200, 'num_leaves': 7, 'subsample': 0.8}

**SVM default parameters**:

| C | 1.0 |
| --- | --- |
| break_ties | False |
| cache_size | 200 |
| class_weight | None |
| coef0 | 0.0 |
| decision_function_shape | ovr |
| degree | 3 |
| gamma | scale |
| kernel | rbf |
| max_iter | -1 |
| probability | True |
| random_state | 123 |
| shrinking | True |
| tol | 0.001 |
| verbose | False |

**Optimized parameters of the SVM model：**

| C | 0.1 |
| --- | --- |
| break_ties | False |
| cache_size | 200 |
| class_weight | None |
| coef0 | 0.0 |
| decision_function_shape | ovr |
| degree | 2 |
| gamma | scale |
| kernel | rbf |
| max_iter | -1 |
| probability | True |
| random_state | 123 |
| shrinking | True |
| tol | 0.001 |
| verbose | False |

**Optimal SVM model parameter configuration:**

{'C': 0.1, 'degree': 2, 'gamma': 'scale', 'kernel': 'rbf'}

**ANN default parameters**:

| activation | relu |
| --- | --- |
| alpha | 0.0001 |
| batch_size | auto |
| beta_1 | 0.9 |
| beta_2 | 0.999 |
| early_stopping | False |
| epsilon | 0.0 |
| hidden_layer_sizes | (100,) |
| learning_rate | constant |
| learning_rate_init | 0.001 |
| max_fun | 15000 |
| max_iter | 500 |
| momentum | 0.9 |
| n_iter_no_change | 10 |
| nesterovs_momentum | True |
| power_t | 0.5 |
| random_state | 123 |
| shuffle | True |
| solver | adam |
| tol | 0.0001 |
| validation_fraction | 0.1 |
| verbose | False |
| warm_start | False |

**Optimized parameters of the ANN model：**

| activation | logistic |
| --- | --- |
| alpha | 0.0001 |
| batch_size | auto |
| beta_1 | 0.9 |
| beta_2 | 0.999 |
| early_stopping | False |
| epsilon | 0.0 |
| hidden_layer_sizes | (100,) |
| learning_rate | constant |
| learning_rate_init | 0.001 |
| max_fun | 15000 |
| max_iter | 500 |
| momentum | 0.9 |
| n_iter_no_change | 10 |
| nesterovs_momentum | True |
| power_t | 0.5 |
| random_state | 123 |
| shuffle | True |
| solver | adam |
| tol | 0.0001 |
| validation_fraction | 0.1 |
| verbose | False |
| warm_start | False |

**Optimal ANN model parameter configuration:**

{'activation': 'logistic', 'hidden_layer_sizes': (100,)}
